# Supplementary material for: Evaluation of microstructural brain changes in post-coronavirus disease 2019 (COVID-19) patients with neurological symptoms: a cross-sectional study
Source: PubMed Central journal article supplement — Quant Imaging Med Surg. 2024 Jul 12;14(8):5499–512. doi: 10.21037/qims-24-162 (PMC11320515; doi:10.21037/qims-24-162), 2024-07-12
Supplement: qims-14-08-5499-rc.pdf [file qims-14-08-5499-rc.pdf]

## STROBE Statement—checklist of items that should be included in reports of observational studies

| Section/item        | Item No | Recommendation                                                                                                                                                                                                                                                             | Reported on Page Number/Line Number | Reported on Section/Paragraph            |
|---------------------|---------|----------------------------------------------------------------------------------------------------------------------------------------------------------------------------------------------------------------------------------------------------------------------------|-------------------------------------|------------------------------------------|
| Title and abstract  | 1       | (a) Indicate the study's design with a commonly used term in the title or the abstract                                                                                                                                                                                     | Page1/Lines 1–2                     | Title                                    |
|                     |         | (b) Provide in the abstract an informative and balanced summary of what was done and what was found                                                                                                                                                                        | Page2–3/Lines 29–66                 | Abstract/Paragraph1–5                    |
| <b>Introduction</b> |         |                                                                                                                                                                                                                                                                            |                                     |                                          |
| Background/         | 2       | Explain the scientific background and rationale for the investigation being reported                                                                                                                                                                                       | Pages4–5/ Lines 70–115              | Introduction/Paragraph1–3                |
| Objectives          | 3       | State specific objectives, including any prespecified hypotheses                                                                                                                                                                                                           | Pages4–6/Lines 89–113               | Introduction/Paragraph                   |
| <b>Methods</b>      |         |                                                                                                                                                                                                                                                                            |                                     |                                          |
| Study design        | 4       | Present key elements of study design early in the paper                                                                                                                                                                                                                    | Pages6–7/Lines 116–161              | Methods/Paragraph 1–3                    |
| Setting             | 5       | Describe the setting, locations, and relevant dates, including periods of recruitment, exposure, follow-up, and                                                                                                                                                            | Pages6–7/lines118–142               | Methods/Paragraph1–2                     |
| Participants        | 6       | (a) <b>Cohort study</b> —Give the eligibility criteria, and the sources and methods of selection of participants. Describe methods of follow-up<br><b>Case-control study</b> —Give the eligibility criteria, and the sources and methods of case ascertainment and control | Pages6–8/lines116–167               | Methods/Study Participants/Paragraph 1–4 |
|                     |         | (b) <b>Cohort study</b> —For matched studies, give matching criteria and number of exposed and unexposed<br><b>Case-control study</b> —For matched studies, give matching criteria and the number of controls per case                                                     | N/A                                 | N/A                                      |
| Variables           | 7       | Clearly define all outcomes, exposures, predictors, potential confounders, and effect modifiers. Give                                                                                                                                                                      | Pages6–8/Lines144–161               | Methods Paragraph 2–3                    |
| Data sources/       | 8*      | For each variable of interest, give sources of data and details of methods of assessment (measurement).<br>Describe comparability of assessment methods if there is more than one                                                                                          | Pags8–10/Lines168–219               | Methods/MRI acquisition/paragraph 1–     |
| Bias                | 9       | Describe any efforts to address potential sources of bias                                                                                                                                                                                                                  | N/A                                 | N/A                                      |
| Study size          | 10      | Explain how the study size was arrived at                                                                                                                                                                                                                                  | Pages6–7/Lines 134–                 | Methods/paragraph 2                      |
| Quantitativ         | 11      | Explain how quantitative variables were handled in the analyses. If applicable, describe which groupings                                                                                                                                                                   | Pages 7–8/ lines144–167             | Methods/paragraph 2–4                    |

|                     |     |                                                                                                                                                                                           |                          |                                       |
|---------------------|-----|-------------------------------------------------------------------------------------------------------------------------------------------------------------------------------------------|--------------------------|---------------------------------------|
| Statistical methods | 12  | (a) Describe all statistical methods, including those used to control for confounding                                                                                                     | Pages10–13/Lines 222–    | Methods/stat.analysis                 |
|                     |     | (b) Describe any methods used to examine subgroups and interactions                                                                                                                       | Pages10/Lines 222–231    | Methods/ stat.analysis                |
|                     |     | (c) Explain how missing data were addressed                                                                                                                                               | Pages10/Lines 222–225    | Methods/stat.analysis                 |
|                     |     | (d) <b>Cohort study</b> —If applicable, explain how loss to follow-up was addressed<br><b>Case-control study</b> —If applicable, explain how matching of cases and controls was addressed | Pages10–12/Lines 222–257 | Methods/stat.analysis<br>Paragraph1–7 |
|                     |     | (e) Describe any sensitivity analyses                                                                                                                                                     | Pages11–12/Lines 241–    | Methods// stat.analysis               |
| <b>Results</b>      |     |                                                                                                                                                                                           |                          |                                       |
| Participants        | 13* | (a) Report numbers of individuals at each stage of study—eg numbers potentially eligible, examined for eligibility,                                                                       | Page12–13/Lines259–292   | Results/pragraph1–5                   |
|                     |     | (b) Give reasons for non-participation at each stage                                                                                                                                      | Page6/Lines 137–142      | Methods/Study                         |
|                     |     | (c) Consider use of a flow diagram                                                                                                                                                        | Page7–10/Lines160–210    | Methods/Figure1–2                     |
| Descriptive data    | 14* | (a) Give characteristics of study participants (eg demographic, clinical, social) and information on                                                                                      | Page7–8/Lines160–161     | Methods/paragraph3                    |
|                     |     | (b) Indicate number of participants with missing data for each variable of interest                                                                                                       | N/A                      | N/A                                   |
|                     |     | (c) <b>Cohort study</b> —Summarise follow-up time (eg, average and total amount)                                                                                                          | N/A                      | Not cohort study                      |
| Outcome data        | 15* | <b>Cohort study</b> —Report numbers of outcome events or summary measures over time                                                                                                       | N/A                      | Not cohort study                      |
|                     |     | <b>Case-control study</b> —Report numbers in each exposure category, or summary measures of exposure                                                                                      | N/A                      | Not case-control                      |
|                     |     | <b>Cross-sectional study</b> —Report numbers of outcome events or summary measures                                                                                                        | Pages6/lines 134–142     | Methods/Study                         |
| Main results        | 16  | (a) Give unadjusted estimates and, if applicable, confounder-adjusted estimates and their precision (eg, 95%                                                                              | Pages12–13/Lines 260–279 | Results/Paragraph 1–3.                |
|                     |     | (b) Report category boundaries when continuous variables were categorized                                                                                                                 | N/A                      | N/A                                   |
|                     |     | (c) If relevant, consider translating estimates of relative risk into absolute risk for a meaningful time period                                                                          | N/A                      | N/A                                   |
| Other analyses      | 17  | Report other analyses done—eg analyses of subgroups and interactions, and sensitivity analyses                                                                                            | N/A                      | N/A                                   |
| <b>Discussion</b>   |     |                                                                                                                                                                                           |                          |                                       |
| Key results         | 18  | Summarise key results with reference to study objectives                                                                                                                                  | Page13–14/Lines 296–     | Discussion/Paragraph1                 |
| Limitations         | 19  | Discuss limitations of the study, taking into account sources of potential bias or imprecision. Discuss both                                                                              | Page16/Lines 349–348     | Discussion/Paragraph4                 |

|                   |    |                                                                                                                   |                          |                         |
|-------------------|----|-------------------------------------------------------------------------------------------------------------------|--------------------------|-------------------------|
| Interpretation    | 20 | Give a cautious overall interpretation of results considering objectives, limitations, multiplicity of analyses,  | Pages13–16/Lines 296–358 | Discussion/Paragraph1–6 |
| Generalisability  | 21 | Discuss the generalisability (external validity) of the study results                                             | Page16/Lines 360–364     | Conclusion/Paragraph1   |
| Other information |    |                                                                                                                   |                          |                         |
| Funding           | 22 | Give the source of funding and the role of the funders for the present study and, if applicable, for the original | Page17/Lines 382–383     | Acknowledgments/Funding |

\*Give information separately for cases and controls in case–control studies and, if applicable, for exposed and unexposed groups in cohort and cross–sectional studies.

**Note:** An Explanation and Elaboration article discusses each checklist item and gives methodological background and published examples of transparent reporting. The STROBE checklist is best used in conjunction with this article (freely available on the Web sites of PLoS Medicine at <http://www.plosmedicine.org/>, Annals of Internal Medicine at <http://www.annals.org/>, and Epidemiology at <http://www.epidem.com/>). Information on the STROBE Initiative is available at [www.strobe-statement.org](http://www.strobe-statement.org).

Article information: <https://dx.doi.org/10.21037/qims-24-162>

\*As the checklist was provided upon initial submission, the page number/line number reported may be changed due to copyediting and may not be referable in the published version. In this case, the section/paragraph may be used as an alternative reference.
